# Supplementary material for: ‘All We Have to Decide Is What to Do with the Time That Is Given to Us’ a Photovoice Study on Physical Activity in Nursing Homes
Source: MDPI journal article supplement (doi:10.3390/ijerph18105481), 2021-05-20
Supplement: s1 [file s1]

| Englisch                                                                                                                                                                                                                                      | Deutsch                                                                                                                                                                                                                |
|-----------------------------------------------------------------------------------------------------------------------------------------------------------------------------------------------------------------------------------------------|------------------------------------------------------------------------------------------------------------------------------------------------------------------------------------------------------------------------|
| <i>Long stretches without obstacles promote physical activity, as they can be used by residents with wheelchairs and walkers regardless of weather conditions</i>                                                                             | lange Wege ohne Hindernisse sind fördernd, da auch für Rollstühle und Rollatoren wetterunabhängig geeignet“                                                                                                            |
| <i>Closed doors are impedimental because the desire for physical activity is halted. “[residents]you shall not pass”</i>                                                                                                                      | “Verschlossene Türen hemmen da Bewegungsdrang unterbrochen wird. „Sie kommen nicht weiter“                                                                                                                             |
| <i>Obstacles inhibit movement and increase the risk of falling; it is difficult to get past them</i>                                                                                                                                          | Gegenstände im Weg sind hemmend und Sturzgefahr, man kommt schlecht daran vorbei“                                                                                                                                      |
| <i>Not enough space is restrictive for PA, there is no space to turn around with a wheelchair or a rollator</i>                                                                                                                               | zu wenig Platz ist hemmend kein Platz zum Wenden mit Rollstuhl und Rollator, ortgebunden“                                                                                                                              |
| <i>The resident is tied to the place</i>                                                                                                                                                                                                      | Bewohnende sind durch Platzmangel ortsgebunden                                                                                                                                                                         |
| <i>Staircases are beneficial for PA, as [their use] results in the activation of more muscle groups (contracture prophylaxis), independence from the elevator and the opportunity to move about the entire house.</i>                         | Treppen sind bewegungsförderlich, da mehr Muskelgruppen beansprucht werden → Kontrakturprophylaxe, Unabhängigkeit vom Aufzug, Bewegung im ganzen Haus möglich“<br>„. Verlassen des Hauses nur mit Hilfe möglich“       |
| <i>If the staircases cannot be negotiated, mobility is significantly restricted</i>                                                                                                                                                           | Wenn die Treppe nicht überwunden werden kann, wird der Bewegungsradius deutlich eingeschränkt                                                                                                                          |
| <i>A defective elevator inhibits PA because movement is restricted to the living area under certain circumstances</i>                                                                                                                         | Defekter Aufzug hemmend, da Bewegungsradius unter Umständen auf ein Wohnbereich begrenzt ist                                                                                                                           |
| <i>In the interior courtyard residents with and without dementia [residents] can walk around outside independently</i>                                                                                                                        | Im Innenhof können sich auch demente Bewohnende frei bewegen                                                                                                                                                           |
| <i>Standing on their legs with their full body weight</i>                                                                                                                                                                                     | Stehen mit ganzem Gewicht auf den Beinen                                                                                                                                                                               |
| <i>Being able to stand up straight</i>                                                                                                                                                                                                        | Aufrechtes stehen möglich                                                                                                                                                                                              |
| <i>The device performs the task of getting up, not muscular strength</i>                                                                                                                                                                      | Gerät übernimmt das Ausstehen nicht Muskelkraft                                                                                                                                                                        |
| <i>[residents] Need to use their arms and hands to grip and hold</i>                                                                                                                                                                          | Müssen Arme und Hände bewegen zum festhalten                                                                                                                                                                           |
| <i>Walkers are beneficial as they reduce the risk of falling, are an alternative to manual fixation, rests are possible at any time</i>                                                                                                       | Walker sind förderlich, da Verringerung der Sturzgefahr, Alternative zur Fixierung, Pausen jederzeit möglich                                                                                                           |
| <i>Rollators are supportive because they provide a feeling of security, thus interrupting the fear-of-falling spiral, rests are possible, objects can be transported in the basket, thus allowing to focus on walking and not on carrying</i> | Rollatoren sind förderlich weil, gibt Sicherheit, dadurch Durchbrechen der Angst- Sturz Spirale, Pausen sind möglich, Dinge können im Korb transportiert werden, dadurch Konzentration auf gehen und nicht aufs tragen |
| <i>The wheelchair promotes the ability to move with one's hands and feet, to overcome greater distances, rests are possible at any time</i>                                                                                                   | Rollstuhl fördert, weil Möglichkeit mit Händen und Füßen sich fortzubewegen, auch größere Distanzen zu überwinden, Pausen jederzeit möglich                                                                            |
| <i>The wheelchair is restrictive [for physical activity], because you let yourself be pushed, you become lazier and more comfortable</i>                                                                                                      | Rollstuhl ist hemmend, weil man sich schieben lässt, fauler und bequemer wird                                                                                                                                          |
| <i>Footrests inhibit PA because residents have no possibility to move by themselves and cannot move their feet and legs</i>                                                                                                                   | Fußstützen sind bewegungshemmend weil Bewohnende keine Möglichkeit zur eigenen Bewegung haben, können die Füße und Beine nicht bewegen.                                                                                |
| <i>Footrests promote PA in hemiparesis, leg prostheses, one leg on the footrest the other is moving</i>                                                                                                                                       | Fußstützen sind bewegungsförderlich bei Hemiparesen, Beinprothesen, ein Bein auf der Fußstütze das andere wird bewegt.                                                                                                 |
| <i>Flower care promotes PA, if flowers are not cared for, they will die and residents have to take care of them, no matter how they are doing</i>                                                                                             | Blumenpflege fördert da, wenn Blumen nicht versorgt werden gehen sie kaputt man muss sich um sie kümmern, egal wie das eigene Befinden ist.                                                                            |

|                                                                                                                                                                                                    |                                                                                                                                                                           |
|----------------------------------------------------------------------------------------------------------------------------------------------------------------------------------------------------|---------------------------------------------------------------------------------------------------------------------------------------------------------------------------|
| <i>Familiar activities from the past (which can be conveyed/transferred to dementia), harvesting (e.g. of herbs or tomatoes) gives a sense of success which enhances the motivation to succeed</i> | Bekannte Tätigkeiten von früher (auch für Demente umsetzbar), Ernte (z.B. von Kräutern oder Tomaten) geben ein Erfolgserlebnis Motivation                                 |
| <i>music = distraction from physical handicaps</i>                                                                                                                                                 | Musik = Ablenkung von körperlichen Gebrechen,                                                                                                                             |
| <i>You can also move to music while sitting, you can't move wrongly to music, it is often associated with positive memories / experiences, enhances motivation.</i>                                | Bewegung zu Musik auch im Sitzen möglich ist, zu Musik gibt es keine falsche Bewegung, wird oft mit positiven Erinnerungen/Erlebnissen in Verbindung gebracht, Motivation |
| <i>Animals are allowed in the nursing home and are beneficial for the residents – provide many stimuli for PA</i>                                                                                  | Tiere sind im Heim erlaubt und förderlich für die Bewohnenden- geben viele Anreize                                                                                        |
| <i>Escape from everyday life and distracts and [let them] forget their frailties</i>                                                                                                               | Clowns im Dienst<br>Ausbruch vom Alltag, Ablenkung und Vergessen der Gebrechlichkeiten                                                                                    |
| <i>Children encourage PA because they [residents] want to prove something, distraction by children, forgetting limitations</i>                                                                     | Kinder fördern, weil etwas beweisen wollen/zeigen dass man auch noch was kann, Ablenkung durch Kinder, Vergessen von Einschränkungen                                      |
